# Supplementary material for: Characterizing the Neuroimmune Environment of Offspring in a Novel Model of Maternal Allergic Asthma and Particulate Matter Exposure
Source: Research Square preprint supplement (doi:10.21203/rs.3.rs-3140415/v1), 2023-07-10
Supplement: Supplementary file 2 [file 5f746bf915e976dea82f56b8.docx]

**P15 Hippocampus**

G.CSF

GM.CSF

IFNg

IL-1a

IL-1b

IL.2

IL-5

IL-6

IL-7

IL-9

IL-10

IL-12p40

IL-12p70

IL-13

IL-15

IL-17

IP-10

KC

MCP-1

MIP-1a

MIP-1b

MIP-2

RANTES

TNFa
