# Supplementary material for: Characterizing the Neuroimmune Environment of Offspring in a Novel Model of Maternal Allergic Asthma and Particulate Matter Exposure
Source: Research Square preprint supplement (doi:10.21203/rs.3.rs-3140415/v1), 2023-07-10
Supplement: Supplementary file 4 [file e033098b761203aa87020701.docx]

G-CSF

INFy

IL-1a

IL-1b

IL-2

IL-4

IL-7

IL-9

IL-10

IL-12p40

IL-13

IL-15

IL-17

IP-10

MCP-1

MIP-1a

MIP-2

RANTES
